# Supplementary material for: Robot-assisted line bisection in patients with Complex Regional Pain Syndrome
Source: PubMed Central journal article supplement (PMC6497371; doi:10.1371/journal.pone.0213732), 2019-05-02
Supplement: pone.0213732.s004.pdf [file pone.0213732.s004.pdf]

## Supporting information

**S1 Table.** Results of the mixed ANOVA, coded according to the side of space (i.e. left vs. right), with *workspace* (ipsilateral vs. contralateral), *vision of the hands* (visible vs. invisible), *position of the static hand* (inside vs. outside the workspace) and *distance of the line from the starting position* (short vs. intermediate vs. long) as within-participant factors, and *which hand is used* (left vs. right) and *group* (CRPS vs. control) as between-participant factors.

| Factors                                                     | F     | <i>p</i> | $\eta^2_p$ |
|-------------------------------------------------------------|-------|----------|------------|
| <i>Group</i>                                                | 5.483 | .027     | .174       |
| <i>Which hand is used</i>                                   | 0.205 | .655     | .008       |
| <i>Group</i> × <i>Which hand is used</i>                    | 2.559 | .122     | .090       |
| <i>Workspace</i>                                            | 0.479 | .495     | .018       |
| <i>Workspace</i> × <i>Group</i>                             | 1.110 | .302     | .041       |
| <i>Workspace</i> × <i>Which hand is used</i>                | 0.035 | .853     | .001       |
| <i>Workspace</i> × <i>Group</i> × <i>Which hand is used</i> | 4.320 | .048     | .142       |
| <i>Vision of the hands</i>                                  | 0.041 | .841     | .002       |

|                                                                     |       |      |      |
|---------------------------------------------------------------------|-------|------|------|
| <i>Vision of the hands × Group</i>                                  | 0.000 | .989 | .000 |
| <i>Vision of the hands × Which hand is used</i>                     | 3.632 | .068 | .123 |
| <i>Vision of the hands × Group × Which hand is used</i>             | 8.606 | .007 | .249 |
| <i>Position of the static hand</i>                                  | 3.773 | .063 | .127 |
| <i>Position of the static hand × Group</i>                          | 2.826 | .105 | .098 |
| <i>Position of the static hand × Which hand is used</i>             | 0.437 | .515 | .017 |
| <i>Position of the static hand × Group × Which hand is used</i>     | 0.840 | .368 | .031 |
| <i>Line distance</i>                                                | 2.905 | .064 | .100 |
| <i>Line distance × Group</i>                                        | 3.680 | .032 | .124 |
| <i>Line distance × Which hand is used</i>                           | 2.298 | .111 | .081 |
| <i>Line distance × Group × Which hand is used</i>                   | 1.948 | .153 | .070 |
| <i>Workspace × Vision of the hands</i>                              | 0.046 | .832 | .002 |
| <i>Workspace × Vision of the hands × Group</i>                      | 0.105 | .749 | .004 |
| <i>Workspace × Vision of the hands × Which hand is used</i>         | 0.008 | .931 | .000 |
| <i>Workspace × Vision of the hands × Group × Which hand is used</i> | 0.013 | .908 | .001 |

|                                                                                                   |       |      |      |
|---------------------------------------------------------------------------------------------------|-------|------|------|
| <i>Workspace × Position of the static hand</i>                                                    | 0.069 | .795 | .003 |
| <i>Workspace × Position of the static hand × Group</i>                                            | 0.438 | .514 | .017 |
| <i>Workspace × Position of the static hand × Which hand is used</i>                               | 0.309 | .583 | .012 |
| <i>Workspace × Position of the static hand × Group × Which hand is used</i>                       | 0.996 | .327 | .037 |
| <i>Vision of the hands × Position of the static hand</i>                                          | 0.082 | .777 | .003 |
| <i>Vision of the hands × Position of the static hand × Group</i>                                  | 2.736 | .110 | .095 |
| <i>Vision of the hands × Position of the static hand × Which hand is used</i>                     | 1.712 | .202 | .062 |
| <i>Vision of the hands × Position of the static hand × Group × Which hand is used</i>             | 2.225 | .148 | .079 |
| <i>Workspace × Vision of the hands × Position of the static hand</i>                              | 0.377 | .544 | .014 |
| <i>Workspace × Vision of the hands × Position of the static hand × Group</i>                      | 0.007 | .935 | .000 |
| <i>Workspace × Vision of the hands × Position of the static hand × Which hand is used</i>         | 3.625 | .068 | .122 |
| <i>Workspace × Vision of the hands × Position of the static hand × Group × Which hand is used</i> | 0.027 | .871 | .001 |
| <i>Workspace × Line distance</i>                                                                  | 5.621 | .006 | .178 |
| <i>Workspace × Line distance × Group</i>                                                          | 6.150 | .004 | .191 |
| <i>Workspace × Line distance × Which hand is used</i>                                             | 3.318 | .044 | .113 |

|                                                                                     |       |      |      |
|-------------------------------------------------------------------------------------|-------|------|------|
| <i>Workspace × Line distance × Group × Which hand is used</i>                       | 1.398 | .256 | .051 |
| <i>Vision of the hands × Line distance</i>                                          | 0.085 | .918 | .003 |
| <i>Vision of the hands × Line distance × Group</i>                                  | 0.022 | .978 | .001 |
| <i>Vision of the hands × Line distance × Which hand is used</i>                     | 0.920 | .405 | .034 |
| <i>Vision of the hands × Line distance × Group × Which hand is used</i>             | 0.032 | .968 | .001 |
| <i>Workspace × Vision of the hands × Line distance</i>                              | 5.188 | .020 | .166 |
| <i>Workspace × Vision of the hands × Line distance × Group</i>                      | 0.474 | .625 | .018 |
| <i>Workspace × Vision of the hands × Line distance × Which hand is used</i>         | 4.250 | .020 | .140 |
| <i>Workspace × Vision of the hands × Line distance × Group × Which hand is used</i> | 2.394 | .101 | .084 |
| <i>Position of the static hand × Line distance</i>                                  | 1.740 | .186 | .063 |
| <i>Position of the static hand × Line distance × Group</i>                          | 0.887 | .418 | .033 |
| <i>Position of the static hand × Line distance × Which hand is used</i>             | 6.787 | .002 | .207 |
| <i>Position of the static hand × Line distance × Group × Which hand is used</i>     | 1.800 | .175 | .065 |
| <i>Workspace × Position of the static hand × Line distance</i>                      | 2.788 | .071 | .097 |
| <i>Workspace × Position of the static hand × Line distance × Group</i>              | 1.966 | .150 | .070 |

|                                                                                                                   |       |      |      |
|-------------------------------------------------------------------------------------------------------------------|-------|------|------|
| <i>Workspace × Position of the static hand × Line distance × Which hand is used</i>                               | 2.319 | .108 | .082 |
| <i>Workspace × Position of the static hand × Line distance × Group × Which hand is used</i>                       | 1.426 | .249 | .052 |
| <i>Vision of the hands × Position of the static hand × Line distance</i>                                          | 0.068 | .892 | .003 |
| <i>Vision of the hands × Position of the static hand × Line distance × Group</i>                                  | 1.101 | .340 | .041 |
| <i>Vision of the hands × Position of the static hand × Line distance × Which hand is used</i>                     | 0.711 | .496 | .027 |
| <i>Vision of the hands × Position of the static hand × Line distance × Group × Which hand is used</i>             | 0.671 | .515 | .025 |
| <i>Workspace × Vision of the hands × Position of the static hand × Line distance</i>                              | 0.001 | .999 | .000 |
| <i>Workspace × Vision of the hands × Position of the static hand × Line distance × Group</i>                      | 1.951 | .152 | .070 |
| <i>Workspace × Vision of the hands × Position of the static hand × Line distance × Which hand is used</i>         | 0.710 | .497 | .027 |
| <i>Workspace × Vision of the hands × Position of the static hand × Line distance × Group × Which hand is used</i> | 0.512 | .602 | .019 |
